# Supplementary material
Source: PubMed Central journal article supplement (PMC10035357)
Supplement: NIHMS1579674-supplement-1.pdf [file NIHMS1579674-supplement-1.pdf]

Table S1 Univariable logistic regression analysis for dosimetric parameters of esophagus.

| Parameter         | Coefficient | Odds ratio (95% CI) | <i>p</i> value |
|-------------------|-------------|---------------------|----------------|
| D <sub>mean</sub> | 0.085       | 1.088 (0.882-1.343) | <0.001         |
| D <sub>max</sub>  | 0.058       | 1.059 (0.874-1.284) | <0.001         |
| V10               | 0.041       | 1.042 (0.888-1.223) | <0.001         |
| V15               | 0.042       | 1.043 (0.889-1.224) | <0.001         |
| V20               | 0.044       | 1.046 (0.890-1.228) | <0.001         |
| V25               | 0.046       | 1.047 (0.891-1.231) | <0.001         |
| V30               | 0.048       | 1.050 (0.892-1.236) | <0.001         |
| V35               | 0.051       | 1.052 (0.892-1.241) | <0.001         |
| V40               | 0.052       | 1.053 (0.892-1.244) | <0.001         |
| V45               | 0.055       | 1.056 (0.892-1.251) | <0.001         |
| V50               | 0.059       | 1.061 (0.891-1.262) | <0.001         |
| V55               | 0.065       | 1.067 (0.891-1.278) | <0.001         |
| V60               | 0.069       | 1.071 (0.887-1.294) | <0.001         |
| V65               | 0.070       | 1.073 (0.878-1.310) | <0.001         |
| V70               | 0.082       | 1.086 (0.866-1.361) | <0.001         |
| V75               | 0.133       | 1.142 (0.824-1.582) | <0.001         |

CI = confidence interval; D<sub>mean</sub> = mean dose; D<sub>max</sub> = maximum dose; V<sub>x</sub> = the percentage of the volume receiving a dose higher than *x* Gy (RBE)

Table S2 LL, AUC, HL test  $p$  values, and AIC differences of models generated by updating one or two parameters of the 3DCRT-based and IMRT-based LKB models with the parameters fit to the current PSPT cohort. The check mark denotes the selected parameters.

|               |                         | $n = 0.24$ | $m = 0.51$ | $TD_{50} = 44.83$ Gy (RBE) | LL              | AUC          | HL test $p$ value | $\Delta AIC^*$ |
|---------------|-------------------------|------------|------------|----------------------------|-----------------|--------------|-------------------|----------------|
| 3DCRT-based   | $n = 0.44$              |            | x          | x                          | -191.357        | 0.777        | <0.001            | 25             |
| model         | $m = 0.32$              | x          |            | x                          | -189.567        | 0.785        | <0.001            | 21             |
| parameter set | $TD_{50} = 51$ Gy (RBE) | x          | x          |                            | -183.527        | 0.785        | 0.013             | 9              |
|               | LL                      | -197.556   | -205.894   | -220.281                   |                 |              |                   |                |
|               | AUC                     | 0.785      | 0.777      | 0.777                      |                 |              |                   |                |
|               | HL test $p$ value       | <0.001     | <0.001     | <0.001                     |                 |              |                   |                |
|               | $\Delta AIC^*$          | 37         | 54         | 83                         |                 |              |                   |                |
| IMRT-based    | $n = 0.69$              |            | x          | x                          | -220.838        | 0.768        | <0.001            | 84             |
| model         | $m = 0.36$              | x          |            | x                          | -184.409        | 0.785        | <0.001            | 11             |
| parameter set | $TD_{50} = 47$ Gy (RBE) | x          | x          |                            | <b>-179.527</b> | <b>0.785</b> | <b>0.153</b>      | <b>1</b>       |
|               | LL                      | -184.942   | -227.517   | -265.092                   |                 |              |                   |                |
|               | AUC                     | 0.785      | 0.768      | 0.768                      |                 |              |                   |                |
|               | HL test $p$ value       | <0.001     | <0.001     | <0.001                     |                 |              |                   |                |
|               | $\Delta AIC^*$          | 12         | 97         | 172                        |                 |              |                   |                |

\* $\Delta AIC = AIC_{\text{new}} - AIC_{\text{optimal}}$ , where  $AIC_{\text{optimal}}$  is the AIC of the optimal model with  $n = 0.24$ ,  $m = 0.51$ ,  $TD_{50} = 44.83$  Gy (RBE).

LL = log likelihood; AUC = area under the receiver operating curve; HL = Hosmer-Lemeshow; AIC = Akaike information criterion; 3DCRT = three-dimensional conformal radiotherapy; IMRT = intensity-modulated radiotherapy; PSPT = passive-scattering proton therapy.

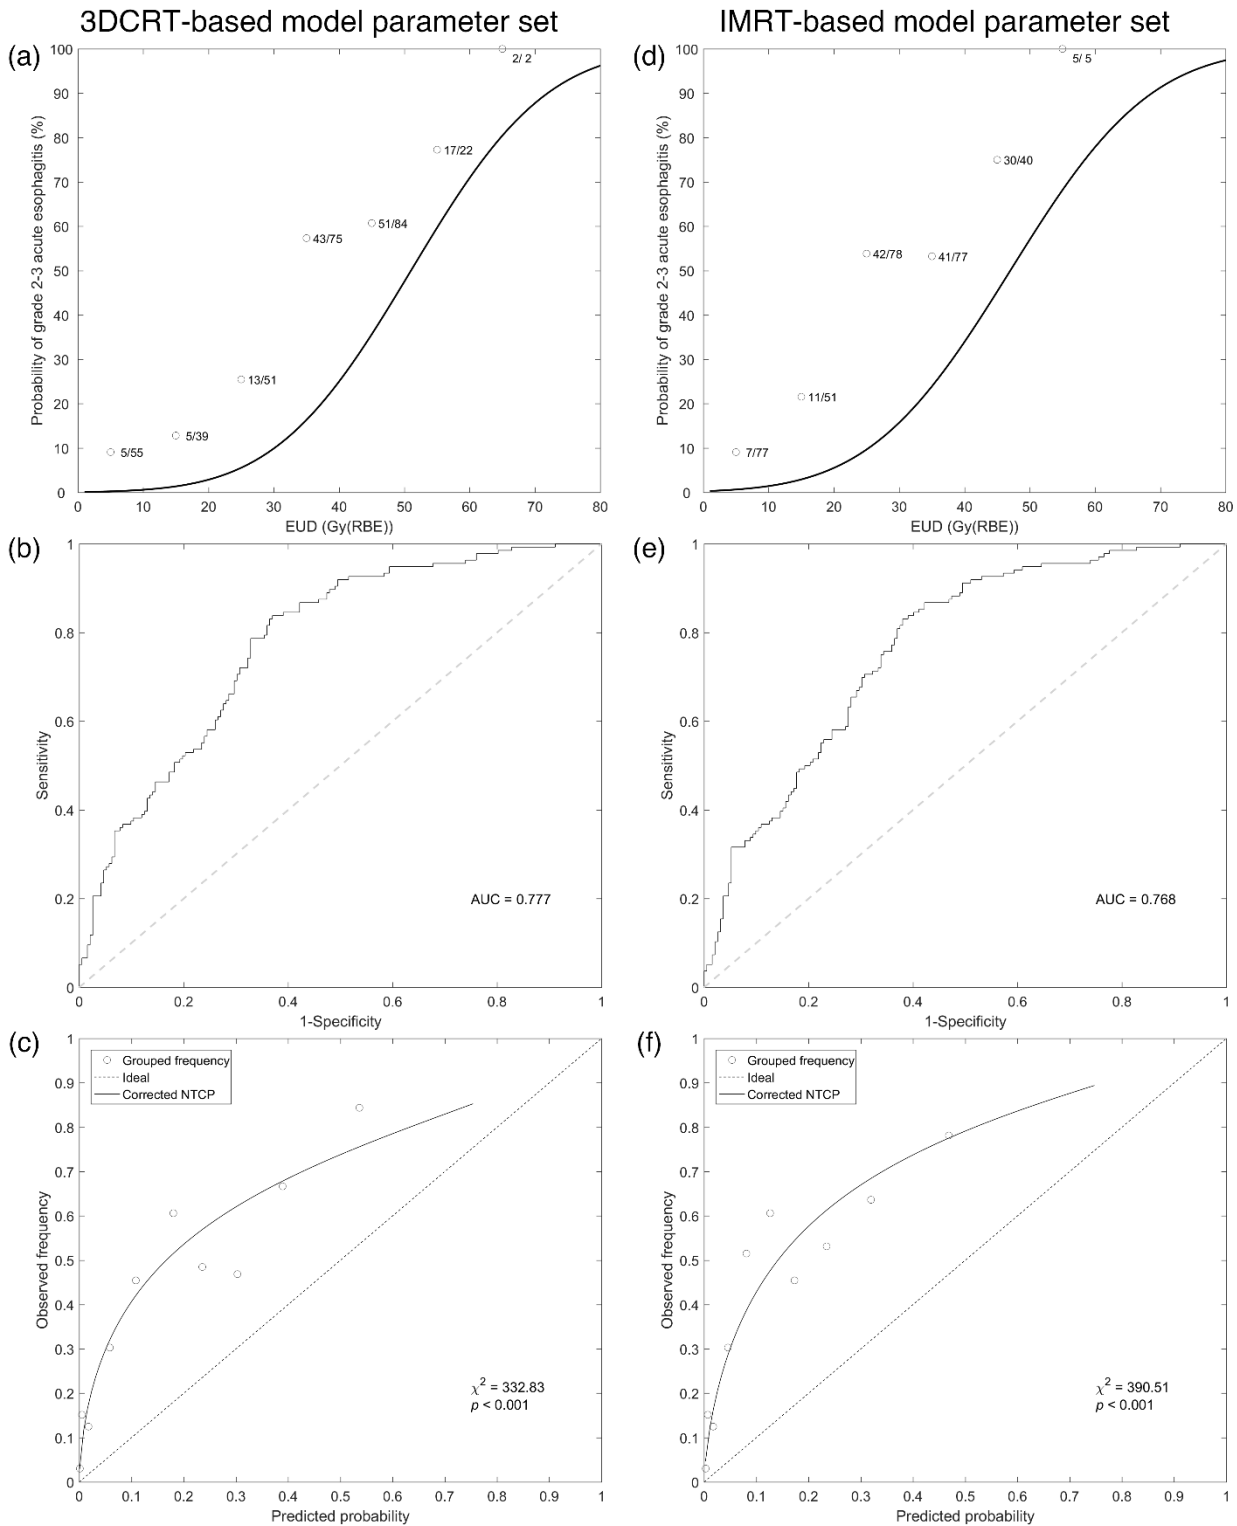

Figure S1 External validation results of the Lyman-Kutcher-Burman normal tissue complication probability (NTCP) models developed for three-dimensional conformal radiotherapy (a-c) and intensity-modulated radiotherapy (d-f). (a) and (d) NTCP curve based on equivalent uniform dose (EUD). Dose range was divided into eight equal parts with a EUD bin of 10 Gy (RBE). For each bin, the circle represents the actual incidence. (b) and (e) Receiver operating characteristic curve. Areas under the curve are given. (c) and (f) Calibration plot with Hosmer-Lemeshow test results.
